# Supplementary material
Source: HighWire-hosted journal article supplement (http://www.cmaj.ca/highwire/filestream/72283/field_highwire_adjunct_files/0/170118-guide-fr.pdf)
Supplement: 170118-guide-fr.pdf [file 170118-guide-fr.pdf]

# Recommandations sur le dépistage de l'anévrisme de l'aorte abdominale en contexte de soins primaires

Groupe d'étude canadien sur les soins de santé préventifs\*

\*La liste de tous les auteurs se trouve à la fin de l'article. La liste des membres actuels du Groupe d'étude canadien sur les soins de santé préventifs se trouve à l'adresse <https://canadiantaskforce.ca/a-propos-du-geccsp/membres/?lang=fr>

■ Citation : *CMAJ* 2017 September 11;191:E1137-45. doi: 10.1503/cmaj.170118

Balados du *CMAJ* : Entrevue en anglais avec l'auteur à l'adresse <https://soundcloud.com/cmajpodcasts/170118-guide>

L'anévrisme de l'aorte abdominale (AAA) est causé par l'affaiblissement d'une partie de la paroi de l'aorte dans l'abdomen, qui fait saillie en raison de la pression du sang, formant un anévrisme<sup>1</sup>. L'anévrisme peut grossir et finir par se rompre, entraînant alors un décès par hémorragie<sup>1</sup>. On estime que, chaque année, 20 000 Canadiens reçoivent un diagnostic d'AAA. Par ailleurs, il y a eu environ 1244 décès des suites d'un AAA par année de 2009 à 2013<sup>2,3</sup>. Comme l'AAA n'est généralement pas symptomatique avant sa rupture<sup>1</sup>, le dépistage permettrait de le diagnostiquer, de surveiller son évolution et de le traiter pour prévenir une rupture.

Les traitements de l'AAA comprennent la greffe d'une prothèse par chirurgie ouverte ou un traitement endovasculaire qui consiste à introduire une prothèse par une incision dans l'aîne et à la déployer dans l'aorte. Les résultats à long-terme sont comparables, mais le traitement endovasculaire est moins efficace et associé à un taux de mortalité périopératoire inférieur à celui de l'intervention chirurgicale<sup>4</sup>.

Le sexe masculin est un important facteur de risque. En effet, la prévalence de l'AAA est 4 à 6 fois plus élevée chez les hommes de 65 à 80 ans que chez les femmes du même groupe d'âge<sup>5,6</sup>. De plus, le tabagisme est associé à la formation, à la dilatation et à la rupture de l'AAA<sup>7,8</sup>. D'autres facteurs de risque de cette maladie comprennent un âge avancé<sup>9</sup> et des antécédents familiaux d'AAA<sup>10,11</sup>. Par contre, les liens entre l'AAA et la coronaropathie, l'athérosclérose, l'hypercholestérolémie et l'hypertension sont plus ténus<sup>8,12</sup>. Les patients atteints de diabète semblent moins susceptibles de présenter un AAA<sup>13</sup>.

## Portée

Selon les lignes directrices du Groupe d'étude canadien sur les soins de santé préventifs sur le dépistage de l'AAA publiées en 1991, les données probantes ne suffisaient pas pour établir des recommandations, que ce soit pour ou contre le dépistage<sup>14</sup>. Depuis ce

## POINTS CLÉS

- Des analyses groupées provenant de 4 études populationnelles contrôlées randomisées menées auprès d'hommes de plus de 65 ans montrent que le dépistage ponctuel de l'AAA par échographie réduit le risque de mortalité, de rupture et de réparation d'urgence lié à l'anévrisme.
- Le dépistage entraîne la détection d'anévrismes qui ne seraient pas dilatés ou rompus, et augmente la probabilité de chirurgie électorale chez ces patients.
- Une recommandation faible en faveur du dépistage suggère la nécessité d'une prise de décision partagée entre le fournisseur de soins primaires et le patient, tenant compte des préférences du patient en matière de dépistage.
- La prévalence de l'AAA dans les populations soumises au dépistage a diminué depuis que les études contrôlées randomisées ont été effectuées, ce qui réduit les bienfaits absolus du dépistage.
- L'AAA est beaucoup moins fréquent chez les femmes que chez les hommes; aucune donnée probante directe ne montre d'effet positif du dépistage sur la santé des femmes.
- Les données probantes sur les effets du dépistage de l'AAA chez les hommes de plus de 80 ans sont indirectes, ce qui signifie que tout bénéfice potentiel est incertain.

temps, les résultats de 4 études contrôlées randomisées<sup>15-18</sup> sur le dépistage de l'AAA ont été publiés. Ces lignes directrices présentent aux fournisseurs de soins primaires des recommandations sur le dépistage de l'AAA chez les adultes asymptomatiques.

## Méthodologie

Le Groupe d'étude est un groupe d'experts indépendant formé de cliniciens et de spécialistes de la méthodologie qui formule des recommandations sur la prévention primaire et secondaire en contexte de soins primaires (voir <https://canadiantaskforce.ca/?lang=fr>).

### Encadré 1: Classification des recommandations

Les recommandations sont classées selon le système GRADE (Grading of Recommendations Assessment, Development and Evaluation)<sup>28</sup>. Le système GRADE propose 2 niveaux de recommandation — forte et faible. La force de nos recommandations repose sur l'équilibre entre les effets désirables et indésirables; la confiance dans l'ampleur des estimations de l'effet des interventions sur les résultats; la confiance dans les valeurs et les préférences, et leur variabilité; et la mesure dans laquelle l'intervention représente une utilisation judicieuse des ressources.

Une recommandation est forte si le Groupe d'étude est convaincu que les effets désirables d'une intervention l'emportent sur les effets indésirables (recommandation forte en faveur d'une intervention) ou que les effets indésirables d'une intervention l'emportent sur les effets désirables (recommandation forte à l'encontre d'une intervention). Une recommandation forte sous-entend que la plupart des personnes bénéficieraient de la mesure recommandée et que la recommandation peut être adoptée en pratique ou comme politique dans la plupart des cas.

Une recommandation forte est normalement fondée sur des données probantes de grande qualité (c.-à-d. une grande confiance dans l'estimation de l'effet d'une intervention). Une recommandation forte peut être faite en faveur d'une intervention (niveau de confiance élevé associé aux bienfaits) ou à l'encontre d'une intervention (niveau de confiance élevé associé aux préjudices). Cependant, dans 5 cas bien précis, le Groupe d'étude pourrait faire une recommandation forte fondée sur des données probantes de faible ou de très faible qualité:<sup>28</sup>

- Lorsque des données probantes de faible qualité semblent indiquer des bienfaits dans une situation potentiellement mortelle (données probantes sur des préjudices de qualité faible ou élevée)
- Lorsque des données probantes de faible qualité semblent indiquer des bienfaits et que des données probantes de qualité élevée semblent indiquer des préjudices ou un coût très élevé
- Lorsque des données probantes de faible qualité semblent indiquer que 2 options sont équivalentes, mais que des données probantes de qualité élevée semblent indiquer des préjudices moins graves associés à 1 de ces 2 options
- Lorsque des données probantes de qualité élevée semblent indiquer que 2 options sont équivalentes, mais que des données probantes de faible qualité semblent indiquer des préjudices associés à 1 de ces 2 options
- Lorsque des données probantes de qualité élevée semblent indiquer des bienfaits modestes et que des données probantes de faible ou de très faible qualité semblent indiquer la possibilité d'un effet indésirable catastrophique

Une recommandation est faible si les effets désirables l'emportent probablement sur les effets indésirables (recommandation faible en faveur d'une intervention) ou dont les effets indésirables l'emportent probablement sur les effets désirables (recommandation faible à l'encontre d'une intervention), mais que le degré d'incertitude est appréciable. Des recommandations faibles sont formulées lorsque l'écart entre les effets désirables et les effets indésirables est étroit, la qualité des données probantes est inférieure ou la variabilité quant aux valeurs et aux préférences des patients est marquée. Les situations où l'équilibre entre le coût et les bienfaits est ambigu, où les parties prenantes clés ne s'entendent pas sur l'acceptabilité ou la faisabilité de la mise en œuvre de la recommandation, et où les répercussions sur l'équité en santé sont incertaines risquent d'entraîner une recommandation faible. Une recommandation faible sous-entend que la plupart des personnes seraient en faveur de la mesure recommandée, mais que de nombreuses personnes ne le seraient pas. Les cliniciens doivent donc reconnaître que le choix approprié sera différent d'une personne à l'autre et aider chaque personne à prendre une décision, en matière de prise en charge, qui corresponde à ses valeurs et à ses préférences. Pour établir une politique en de telles circonstances, il faudra un débat de fond et la participation de diverses parties prenantes.

Les données probantes sont classées de qualité élevée, modérée, faible ou très faible, selon la probabilité que de nouvelles études changent le niveau de confiance du Groupe d'étude dans l'estimation des effets.

Ces recommandations ont été formulées par un groupe de travail formé de 5 membres du Groupe d'étude canadien, avec l'aide de scientifiques de l'Agence de la santé publique du Canada<sup>19</sup>.

Les recommandations sont fondées sur un examen systématique effectué au Centre d'analyse et de synthèse des données probantes de l'Université McMaster (Hamilton, Ontario). Cet examen a permis de mettre à jour l'analyse de 2014 du US Preventive Services Task Force<sup>20</sup> sur les résultats liés au dépistage de l'AAA par échographie<sup>21,22</sup>. Les issues cliniques visées par l'examen systématique comprenaient la mortalité liée à l'AAA, la mortalité toutes causes confondues, la rupture de l'AAA, la mortalité dans les 30 jours suivant une intervention d'urgence ou une intervention élective et l'incidence du dépistage sur la fréquence des interventions d'urgence ou électives. La recension des écrits révisée par des pairs a été effectuée dans MEDLINE, Embase, PubMed et CENTRAL pour la période de janvier 2013 à avril 2015, avec une recension additionnelle des études énumérées dans les revues systématiques pertinentes. Une recherche des données probantes sur le surdiagnostic a été effectuée dans MEDLINE, Embase et Cochrane Central de 2005 à 2015, de même qu'une recherche de questions contextuelles dans MEDLINE, Embase et PsychInfo pendant la même période. Enfin, une recherche de la littérature grise de 2005 à 2015 a révélé des données canadiennes permettant de documenter des questions contextuelles<sup>22</sup>. Le cadre d'analyse utilisé pour l'examen est précisé à l'annexe 1 (voir [www.cmaj.ca/lookup/suppl/doi:10.1503/cmaj.170118/-/DC1](http://www.cmaj.ca/lookup/suppl/doi:10.1503/cmaj.170118/-/DC1)). Le protocole<sup>23</sup> et l'examen systématique<sup>22</sup> ont été revus par des experts de contenu et des parties prenantes en soins de santé.

En prépublication (janvier 2017), une recherche a été effectuée dans les mêmes bases de données, et les données probantes ont été mises à jour en conséquence<sup>24</sup>. Les effets absolus sur les résultats ont aussi été mis à jour lorsqu'ils étaient identifiés comme des bienfaits, plutôt que comme des préjudices<sup>25</sup>.

Les outils de transfert des connaissances qui accompagnent ces lignes directrices ont été conçus dans le cadre du program de transfert des connaissances de l'Hôpital St. Michael (Toronto, Ontario) et sont accessibles sur le site Web du Groupe d'étude. Ils ont été mis au point en tenant compte des commentaires des cliniciens ( $n = 8$ ) pour les outils destinés aux cliniciens et aux patients, et des patients ( $n = 8$ ) pour les outils destinés aux patients. Les préférences des patients ont aussi été prises en considération dans l'élaboration des recommandations. Un groupe de discussion et un sondage ( $n = 19$ ) ont été réalisés auprès d'hommes et de femmes âgés de 65 à 80 ans dans le cadre du program de transfert des connaissances de l'Hôpital St. Michael<sup>26</sup>.

L'outil FACE (Feasibility, Acceptability, Cost and Equity) a été utilisé pour obtenir le point de vue des parties prenantes sur la priorité, la faisabilité, l'acceptabilité, le coût et l'équité de la recommandation<sup>27</sup> (voir l'annexe 2 à l'adresse [www.cmaj.ca/lookup/suppl/doi:10.1503/cmaj.170118/-/DC1](http://www.cmaj.ca/lookup/suppl/doi:10.1503/cmaj.170118/-/DC1)).

Le système GRADE (Grading of Recommendations, Assessment, Development and Evaluation) a été utilisé pour déterminer la qualité des données probantes et la force des recommandations (encadré 1)<sup>28</sup>. Les tableaux GRADE associés à chaque recommandation sont présentés à l'annexe 3 (en ligne à l'adresse [www.cmaj.ca/lookup/suppl/doi:10.1503/cmaj.170118/-/DC1](http://www.cmaj.ca/lookup/suppl/doi:10.1503/cmaj.170118/-/DC1)). Les recommandations ont été révisées au complet et approuvées par le Groupe d'étude canadien, et la version préliminaire des lignes directrices a été revue par des experts de contenu et des parties prenantes externes. Vous trouverez de plus amples renseignements sur la méthodologie utilisée par le Groupe d'étude dans d'autres sources<sup>19</sup>.

## Recommandations

### Dépistage chez les hommes

*Nous recommandons un dépistage ponctuel de l'anévrisme de l'aorte par échographie abdominale chez les hommes âgés de 65 à 80 ans. (Recommandation faible; données probantes de qualité moyenne)*

*Nous ne recommandons pas le dépistage de l'AAA chez les hommes âgés de plus de 80 ans. (Recommandation faible, données probantes de faible qualité)*

### Hommes âgés de 65 ans et plus

Quatre études populationnelles contrôlées randomisées<sup>15-18</sup> ont été menées pour évaluer les résultats liés au dépistage ponctuel de l'AAA par échographie, comparativement aux soins habituels<sup>21,22</sup>, chez des hommes asymptomatiques âgés de 65 ans ou plus (tableau 1). L'une de ces études comprenait des femmes<sup>18</sup> et ces résultats sont présentés à la section sur le dépistage chez les femmes. Les résultats du suivi de 12,8 ans de l'étude menée en Australie-Occidentale<sup>15</sup> ont été publiés en 2016<sup>34</sup>, une fois l'examen systématique<sup>22</sup> du Groupe d'étude canadien terminé. Les données probantes ont été mises à jour

pour tenir compte de ces résultats avant l'élaboration des recommandations<sup>24</sup>.

Le tableau 2 présente les résultats liés au dépistage de l'AAA par échographie chez les hommes âgés de 65 ans et plus, tirés des 4 études contrôlées randomisées pour 2 périodes de suivi, soit de 3 à 5 ans et de 13 à 15 ans. Le dépistage a été associé à une réduction du risque absolu correspondant à 1,3 décès de moins lié à l'AAA par 1000 hommes soumis au dépistage (entre 0,8 et 1,6 décès de moins) pour le suivi de 3 à 5 ans et de 3,2 décès de moins (entre 0,6 et 6,0 décès de moins) pour le suivi de 13 à 15 ans<sup>21,24</sup>. Le nombre de patients devant subir le dépistage pour prévenir un décès lié à l'AAA était de 796 (intervalle de confiance [IC] à 95 % 621-1242) pour le suivi de 3 à 5 ans et de 311 (IC à 95 % 199-1595) pour le suivi de 13 à 15 ans<sup>21,24</sup>.

Aucune différence n'a été observée quant à la mortalité toutes causes confondues pour le suivi de 3 à 5 ans ( $p = 0,10$ ; données probantes de faible qualité); pour le suivi de 13 à 15 ans, une très modeste réduction a été relevée chez les patients soumis au dépistage (données probantes de qualité moyenne)<sup>21,24</sup>.

Le dépistage a entraîné une réduction de la rupture d'AAA, des interventions d'urgence liées à l'AAA et des décès dans les 30 jours suivant une intervention liée à un AAA<sup>21,24,25</sup> (tableau 2). Le dépistage a aussi entraîné une augmentation significative de la probabilité globale d'une intervention et de la probabilité de subir une réparation élective d'un AAA<sup>21,24</sup>.

Une analyse stratifiée a révélé une différence minime entre le groupe soumis au dépistage et le groupe témoin quant à la mortalité dans les 30 jours suivant une intervention élective pour le suivi de 3 à 5 ans (données probantes de qualité moyenne), mais aucune différence pour le suivi de 13 à 15 ans (données probantes de faible qualité)<sup>20,23</sup>. L'intervention d'urgence de l'AAA n'était associée à aucune différence quant à la mortalité dans les 30 jours entre le groupe soumis au dépistage et le groupe témoin, quelle que soit la période de suivi retenue (données probantes de faible qualité)<sup>21,25</sup>.

On a relevé 4 études évaluant l'effet du dépistage de l'AAA sur la qualité de vie (données probantes de très faible qualité) chez les hommes de 65 ans et plus<sup>22</sup>. Des mesures normalisées d'évaluation de la qualité de vie ont été utilisées dans 3 études d'observation,

**Tableau 1: Études contrôlées randomisées sur les issues cliniques liées au dépistage de l'AAA par échographie chez les hommes de 65 ans et plus**

| Étude                                                           | Lieu                         | Taille de l'échantillon | Intervention/témoin                                    | Durée moyenne du suivi, années |
|-----------------------------------------------------------------|------------------------------|-------------------------|--------------------------------------------------------|--------------------------------|
| Multicentre Aneurysm Screening Study (MASS) <sup>17,29-31</sup> | Quatre centres en Angleterre | $n = 67\ 700$           | Intervention, $n = 33\ 883$ ;<br>Témoin, $n = 33\ 887$ | 13,1                           |
| Chichester <sup>6,18,32,33</sup>                                | Angleterre                   | $n = 6433$              | Intervention, $n = 3228$ ;<br>Témoin $n = 3205$        | 15                             |
| Viborg <sup>16,35-37</sup>                                      | Danemark                     | $n = 12\ 639$           | Intervention, $n = 6333$ ;<br>Témoins, $n = 6306$      | 14                             |
| Australie-Occidentale <sup>15,34,38</sup>                       | Australie                    | $n = 38\ 704$           | Intervention, $n = 19\ 249$ ;<br>Témoin $n = 19\ 231$  | 12,8                           |

Note: AAA = anévrisme de l'aorte abdominale.

qui n'ont révélé aucune différence statistiquement significative entre les patients ayant obtenu un résultat positif au dépistage et ceux du groupe témoin<sup>22</sup>. Par ailleurs, les données postdépistage de l'étude MASS (Multicentre Aneurysm Screening Study) n'ont montré aucune différence entre ceux ayant obtenu un résultat positif au dépistage et le groupe témoin quant aux mesures de la qualité de vie<sup>22</sup>.

Une analyse des données de faible qualité sur le suivi de 13 ans de l'étude MASS a montré un taux de surdiagnostic (découverte

d'un AAA qui ne se serait pas rompu) de 45 % (IC à 95 % 42%–47%) dans le groupe ayant obtenu un résultat positif au dépistage<sup>22</sup>. Les auteurs ont calculé que 17,6 (IC à 95 % 15,0–20,2) patients soumis au dépistage sur 1000 feraient l'objet d'un surdiagnostic<sup>39</sup>.

Des études populationnelles sur le dépistage menées dernièrement auprès d'hommes de plus de 65 ans en Angleterre<sup>40</sup> et en Suède<sup>41</sup> montrent un déclin de la prévalence de l'AAA, le taux estimé variant de 1,5% à 1,7%. Le taux d'AAA chez les hommes participant aux études contrôlées randomisées variait de 3,9% à 7,2%<sup>15–18</sup>. La

**Tableau 2 (partie 1 de 2): Résultats des études sur le dépistage ponctuel de l'AAA par échographie chez les hommes de 65 ans et plus\***

| Résultats et période de suivi                                    | Nbre d'études | Cas/patients soumis au dépistage (%) | Cas/patients témoins (%) | Rapport de risque (IC à 95 %) | Risque absolu de décès par 1000            | Réduction du risque absolu, % | Augmentation du risque absolu (%) | Nbre devant subir le dépistage (IC à 95 %) | Qualité des données probantes |
|------------------------------------------------------------------|---------------|--------------------------------------|--------------------------|-------------------------------|--------------------------------------------|-------------------------------|-----------------------------------|--------------------------------------------|-------------------------------|
| Mortalité liée à l'AAA, 3 à 5 ans <sup>22</sup>                  | 4             | 102/62 729 (0,16)                    | 182/62 847 (0,29)        | 0,57 (0,44–0,72)              | 1,3 de moins (0,8 à 1,6 de moins)          | 0,13                          |                                   | 796 (621–1242)                             | ⊕⊕⊕⊖ MOYENNE†                 |
| Mortalité liée à l'AAA, 13 à 15 ans <sup>22,24</sup>             | 4             | 380/62 460 (0,61)                    | 588/62 469 (0,94)        | 0,66 (0,47–0,93)              | 3,2 de moins (0,6 à 5,0 de moins)          | 0,32                          |                                   | 311 (199–1595)                             | ⊕⊕⊕⊖ MOYENNE†                 |
| Mortalité toutes causes confondues, 3 à 5 ans <sup>22</sup>      | 4             | 7453/62 729 (11,9)                   | 7953/62 847 (12,7)       | 0,95 (0,88–1,02)              | 7,0 de moins (15,7 de moins à 2,5 de plus) | N.S.                          |                                   | –                                          | ⊕⊕⊖⊖ FAIBLE‡                  |
| Mortalité toutes causes confondues, 13 à 15 ans <sup>22,24</sup> | 4             | 28 474/62 460 (45,6)                 | 28 899/62 469 (46,3)     | 0,99 (0,98–1,00)              | 6,1 de moins (0,7 à 11,4 de moins)         | 0,61                          |                                   | 164 (88–1441)                              | ⊕⊕⊕⊖ MOYENNE†                 |
| Rupture de l'AAA, 3 à 5 ans <sup>22</sup>                        | 4             | 117/62 729 (0,19)                    | 218/62 847 (0,35)        | 0,52 (0,35–0,79)              | 1,6 de moins (0,7 à 2,3 de moins)          | 0,16                          |                                   | 606 (442–1387)                             | ⊕⊕⊕⊖ MOYENNE†                 |
| Rupture de l'AAA, 13 à 15 ans <sup>22,24</sup>                   | 4             | 415/62 460 (0,66)                    | 674/62 469 (1,1)         | 0,65 (0,51–0,82)              | 3,8 de moins (1,9 à 5,2 de moins)          | 0,38                          |                                   | 264 (191–515)                              | ⊕⊕⊕⊖ MOYENNE†                 |
| Interventions liées à l'AAA, 3 à 5 ans <sup>22</sup>             | 4             | 554/62 729 (0,88)                    | 252/62 847 (0,4)         | 2,16 (1,82–2,57)              | 4,7 de plus (3,3 à 6,3 de plus)            |                               | 0,47                              | 215 (159–305)                              | ⊕⊕⊕⊖ MOYENNE†                 |
| Interventions liées à l'AAA, 13 à 15 ans <sup>22,24</sup>        | 4             | 1408/62 460 (2,3)                    | 1029/62 469 (1,6)        | 1,35 (1,17–1,57)              | 5,9 de plus (2,8 à 9,4 de plus)            |                               | 0,58                              | 171 (107–358)                              | ⊕⊕⊕⊖ MOYENNE†                 |
| Interventions élective, 3 à 5 ans <sup>22</sup>                  | 4             | 505/62 729 (0,81)                    | 162/62 847 (0,26)        | 3,25 (2,13–4,96)              | 5,8 de plus (2,9 à 10,2 de plus)           |                               | 0,58                              | 172 (98–342)                               | ⊕⊕⊕⊖ MOYENNE†                 |
| Interventions élective, 13 à 15 ans <sup>22,24</sup>             | 4             | 1266/62 460 (2,0)                    | 754/62 469 (1,2)         | 1,83 (1,29–2,59)              | 10,0 de plus (3,6 à 19,2 de plus)          |                               | 1,00                              | 100 (52–281)                               | ⊕⊕⊕⊖ MOYENNE†                 |
| Interventions d'urgence, 3 à 5 ans <sup>22,25</sup>              | 4             | 44/62 729 (0,07)                     | 90/62 847 (0,14)         | 0,50 (0,29–0,86)              | 0,7 de moins (0,2 à 1,0 de moins)          | 0,07                          | –                                 | 1389 (980–4975)                            | ⊕⊕⊕⊖ MOYENNE†                 |

réduction de la prévalence de l'AAA dans les dernières années a été attribuée à des changements liés à l'usage du tabac et à une meilleure prise en charge de l'hypertension et de l'hypercholestérolémie<sup>40,41</sup>.

### Hommes de plus de 80 ans

L'âge des participants aux études contrôlées randomisées allait de 64 à 83 ans<sup>22</sup> (les patients les plus âgés avaient 73 ans [Viborg]<sup>16</sup>, 74 ans [MASS]<sup>17</sup>, 80 ans [Chichester]<sup>18</sup> et 83 ans [Australie-Occidentale]<sup>15</sup>). La qualité des données probantes obtenues chez les hommes de plus de 80 ans a été déclassée, passant de moyenne à faible, car il s'agissait de données indirectes. En effet, les résultats du dépistage chez ces participants n'ont pas été rapportés séparément<sup>42</sup>. Même lorsqu'ils étaient invités à subir le dépistage, les hommes de plus de 75 ans étaient moins susceptibles de s'y prêter que les hommes plus jeunes<sup>15,18</sup>.

### Dépistage chez les femmes

*Nous ne recommandons pas le dépistage de l'AAA chez les femmes. (Recommandation forte, données probantes de très faible qualité).* Seule 1 des 4 études contrôlées randomisées faisant partie de l'examen systématique<sup>22</sup> — celle de Chichester<sup>18</sup> — a évalué les bienfaits et les préjudices du dépistage de l'AAA chez les femmes ( $n = 4682$  soumises au dépistage;  $n = 4660$  témoins). Aucune différence n'a été observée quant aux résultats entre le groupe soumis au dépistage et le groupe témoin après 5 et 10 ans de suivi<sup>22</sup>. Aucune étude d'observation n'a été identifiée sur le dépistage de l'AAA chez les femmes. La qualité des données probantes obtenues chez les femmes a été déclassée, passant de moyenne

à très faible, en raison d'un échantillon insuffisant et d'un intervalle de confiance large. Par conséquent, les données risquaient fort d'être imprécises<sup>42</sup>.

Dans le cadre d'études d'observation, l'AAA était 4 à 6 fois moins courant chez les femmes de 65 à 80 ans que chez les hommes du même groupe d'âge, ce qui limite les bienfaits potentiels du dépistage<sup>5,6</sup>. Une méta-analyse récente montre que les femmes sont plus à risque de décès à la suite d'une réparation d'AAA, ce qui pourrait réduire davantage les bienfaits potentiels du dépistage<sup>43</sup>.

### Valeurs et préférences des patients

Dans le groupe de discussion et le sondage menés auprès d'hommes et de femmes de 65 à 80 ans ( $n = 19$ ) pour connaître les préférences des patients, les participants ont été informés des bienfaits et des risques potentiels liés au dépistage de l'AAA, notamment le surdiagnostic. La plupart des participants opéreraient pour le dépistage s'ils estimaient que les facteurs de risque d'AAA s'appliquaient à eux. Par contre, les participants s'entendaient moins sur la question d'encourager les personnes de plus de 80 ans à se prêter au dépistage<sup>26</sup>.

### Utilisation des ressources

L'examen systématique<sup>22</sup> a fait état du rapport coût-efficacité du dépistage de l'AAA d'après les résultats de 2 examens systématiques<sup>44,45</sup>, d'une étude contrôlée randomisée<sup>33</sup> et de 3 études de modélisation<sup>46-48</sup>. Le dépistage de l'AAA s'est avéré rentable, avec un rapport coût-efficacité différentiel de moins de 30 000 \$ US

**Tableau 2 (partie 2 de 2): Résultats des études sur le dépistage ponctuel de l'AAA par échographie chez les hommes de 65 ans et plus\***

| Résultats et période de suivi                                                                   | Nbre d'études | Cas/patients soumis au dépistage (%) | Cas/patients témoins (%) | Rapport de risque (IC à 95%) | Risque absolu de décès par 1000        | Réduction du risque absolu, % | Augmentation du risque absolu (%) | Nbre devant subir le dépistage (IC à 95%) | Qualité des données probantes |
|-------------------------------------------------------------------------------------------------|---------------|--------------------------------------|--------------------------|------------------------------|----------------------------------------|-------------------------------|-----------------------------------|-------------------------------------------|-------------------------------|
| Interventions d'urgence, 13 à 15 ans <sup>24,25</sup>                                           | 4             | 142/62 460 (0,23)                    | 275/62 469 (0,44)        | 0,52 (0,42–0,63)             | 2,1 de moins (1,6 à 2,5 de moins)      | 0,21                          | –                                 | 471 (394–622)                             | ⊕⊕⊕○ MOYENNE†                 |
| Mortalité dans les 30 jours suivant une intervention liée à l'AAA, 3 à 5 ans <sup>22,25</sup>   | 3             | 29/501 (5,8)                         | 41/221 (18,6)            | 0,31 (0,20–0,48)             | 128,0 de moins (95,7 à 149,0 de moins) | 12,83                         | –                                 | 8 (7–10)                                  | ⊕⊕⊕○ MOYENNE†                 |
| Mortalité dans les 30 jours suivant une intervention liée à l'AAA, 13 à 15 ans <sup>24,25</sup> | 3             | 92/1 299 (7,1)                       | 119/941 (12,6)           | 0,55 (0,39–0,80)             | 56,3 de moins (25,6 à 77,7 de moins)   | 5,63                          | –                                 | 18 (13–39)                                | ⊕⊕⊕○ MOYENNE†                 |

Note: AAA = anévrisme de l'aorte abdominale, IC = intervalle de confiance, N.S. = non significative.

\*La réduction et l'augmentation estimées du risque absolu sont tirées des résultats regroupés des études sur le dépistage de l'AAA. La prévalence de l'AAA pendant les études dans la population d'hommes de 65 ans et plus soumis au dépistage était de 3,9 % à 7,2 %. Les dernières estimations de la prévalence populationnelle dans des pays comparables au Canada allaient de 1,5 % à 1,7 %, ce qui réduit les bienfaits du dépistage.

†Déclassée, passant à moyenne en raison du risque sérieux de biais.

‡Déclassée, passant à faible en raison du risque sérieux de biais et d'imprécision des données.

par année de vie gagnée ajustée en fonction de la qualité<sup>22</sup>. Un récent rapport sur les résultats du program national de dépistage en Suède montre que le dépistage de l'AAA reste rentable malgré le déclin de la prévalence et le recours à des interventions plus coûteuses<sup>49</sup>.

### Faisabilité, acceptabilité, coût et équité

La plupart des parties prenantes d'organismes de santé ( $n = 5$ ) ayant répondu au sondage FACE ont indiqué que les recommandations présentées étaient faisables, acceptables, abordables, et qu'elles n'auraient aucun effet négatif sur l'équité en santé. Les intervenants ont aussi exprimé leur intention de mettre en œuvre les recommandations (annexe 2).

### Justification

#### Hommes âgés de 65 à 80 ans

Selon des données probantes de qualité moyenne, le dépistage chez les hommes de 65 à 80 ans entraînera une légère réduction de la mortalité liée à l'AAA, du nombre de ruptures d'AAA et du taux d'interventions d'urgence<sup>22,24</sup>. Bien que certaines interventions électives soient effectuées à la suite du dépistage d'un AAA qui ne se serait jamais rompu, en raison d'un surdiagnostic, le Groupe d'étude juge que la réduction du risque de mortalité liée à l'AAA, de rupture d'AAA et d'interventions d'urgence associées au dépistage surpasse ce préjudice potentiel<sup>22,24</sup>. Comme les bénéfices globaux surpassent les préjudices chez les hommes de 65 à 80 ans, le dépistage est donc recommandé chez les hommes de ce groupe d'âge.

La recommandation est faible (même si les préférences des hommes de ce groupe d'âge varient peu) en raison de l'incertitude concernant l'impact du déclin du taux d'AAA, qui pourrait réduire la confiance envers l'ampleur des bienfaits potentiels du dépistage. Une recommandation faible en faveur du dépistage souligne la nécessité d'une prise de décision partagée avec les patients<sup>50,51</sup>. Des outils de transfert des connaissances sont accessibles sur le site Web du Groupe d'étude (<https://canadiantaskforce.ca/?lang=fr>) pour soutenir ce processus.

Bien que des données probantes montrent une augmentation du risque d'AAA chez les fumeurs<sup>8</sup>, le Groupe d'étude n'a pas fait de recommandation particulière quant au dépistage dans cette population, car il n'existe aucune donnée probante sur les résultats liés au dépistage de l'AAA chez les fumeurs<sup>20</sup>.

#### Hommes de plus de 80 ans

Bien que la prévalence de l'AAA augmente avec l'âge<sup>9,52</sup>, le Groupe d'étude a jugé que les bienfaits du dépistage chez les hommes de plus de 80 ans seraient inférieurs à ceux chez les hommes de 80 ans ou moins, car les hommes plus âgés sont plus susceptibles de présenter des problèmes médicaux qui augmentent leur risque d'effets indésirables liés à une réparation d'AAA élective. Les bienfaits du dépistage chez les hommes de plus de 80 ans ne surpassent probablement pas les préjudices. Par conséquent, le Groupe d'étude ne recommande pas le dépistage chez les hommes de ce groupe d'âge.

La recommandation est faible, car l'incertitude demeure en raison de la faible qualité des données probantes sur l'ampleur de l'effet du dépistage chez les hommes de plus de 80 ans. Ainsi, les fournisseurs de soins primaires devraient discuter des préférences de leurs patients avec les hommes en bonne santé de plus de 80 ans, chez lesquels une réparation élective de l'AAA serait moins risquée.

#### Femmes

Des données probantes de très faible qualité tirées d'une étude contrôlée randomisée de puissance insuffisante montrent que le dépistage de l'AAA chez les femmes n'est associé à aucune amélioration de l'état de santé<sup>22,42</sup>. Même à l'époque où l'AAA était plus courant, il survenait moins souvent chez les femmes, et généralement plus tard dans la vie que chez les hommes. Les bienfaits sont donc peu probables. Les femmes sont aussi plus à risque de décès à la suite d'une intervention liée à l'AAA<sup>43</sup>. Selon le Groupe d'étude, des données probantes de très faible qualité semblent indiquer que les femmes ne tirent aucun bienfait du dépistage, et le décès à la suite d'une intervention liée à l'AAA est un préjudice potentiel. Nous ne recommandons donc pas le dépistage de l'AAA chez les femmes.

La recommandation est forte, car le risque d'AAA est beaucoup plus faible chez les femmes, le dépistage de l'AAA causerait du tort à certaines femmes et accaparerait des ressources qui pourraient autrement être affectées à des interventions dont l'efficacité a été démontrée.

### Considérations relatives à la mise en œuvre des recommandations

Le sexe masculin, les antécédents familiaux et le vieillissement sont autant de facteurs associés à un risque accru d'AAA<sup>5,6,9-11</sup>. Un examen des études d'observation sur le risque d'AAA chez les fumeurs<sup>53</sup> a révélé que ces derniers sont plus à risque de présenter un AAA que les personnes qui n'ont jamais fumé; les personnes qui fument actuellement sont plus à risque de présenter un AAA que les anciens fumeurs; et les personnes qui fument plus de 20 cigarettes par jour sont plus à risque de présenter un AAA que celles qui fument moins. Une méta-analyse effectuée par la RESCAN Collaboration<sup>54</sup> a révélé que le tabagisme actif a un effet modeste sur la croissance de l'AAA mais double le risque de rupture. Les cliniciens pourraient demander aux patients quels sont leurs antécédents de tabagisme dans le cadre d'une discussion sur le dépistage de l'AAA, car les patients ayant déjà fumé pourraient être plus intéressés par le dépistage.

Des données probantes indiquent que l'insuffisance cardiaque, l'insuffisance rénale, la maladie pulmonaire obstructive chronique, la maladie vasculaire périphérique, la maladie cérébrovasculaire, la cardiopathie ischémique et le diabète sont associés à un risque accru de décès à la suite de la réparation élective d'un AAA<sup>55</sup>. Il est important que les hommes de 65 à 80 ans atteints d'une telle affection chronique soient conscients des risques associés à la réparation non urgente d'un AAA avant d'opter pour le dépistage. Par contre, les hommes de plus de 80 ans qui

ne présentent pas une telle affection pourraient opter pour le dépistage. Le vieillissement et le sexe féminin sont aussi associés à un risque accru de décès à la suite de la réparation d'un AAA<sup>55</sup>.

L'échographie a été utilisée pour le dépistage de l'AAA dans le cadre des études contrôlées randomisées, à cause de sa facilité relative d'exécution et d'une sensibilité et spécificité connues. Une étude d'observation canadienne a montré que, si l'on offre une formation, le dépistage de l'AAA est précis et faisable en médecine familiale<sup>56</sup>.

La réparation endovasculaire est moins efficace qu'une intervention chirurgicale classique et est associée à un taux de mortalité périopératoire inférieur, bien que les résultats à long-terme soient similaires pour les 2 méthodes<sup>4</sup>. Aucune étude randomisée n'a permis d'évaluer les bienfaits de la réparation endovasculaire à la suite du dépistage, comparativement à la réparation sans dépistage. Cependant, de l'avis du Groupe

d'étude, il est raisonnable de supposer que les bienfaits associés à la réparation à la suite du dépistage sont comparables pour les techniques endovasculaire et conventionnelle. Comme elle est moins efficace, la réparation endovasculaire peut sembler encourager le dépistage à un stade précoce (c.-à-d. lorsque l'AAA est plus petit), donc plus tôt que l'intervention conventionnelle, mais aucune donnée d'étude n'appuie une telle pratique<sup>20</sup>. Compte tenu de la nature moins efficace des interventions endovasculaires et des taux inférieurs de décès périopératoire, les patients pourraient être plus enclins à se prêter au dépistage lorsque ce type de réparation est offert.

### Mesures de performance suggérées pour la mise en œuvre des recommandations

Les mesures de performance suggérées pour la mise en œuvre des recommandations comprennent la proportion d'hommes de

**Tableau 3: Lignes directrices nationales et internationales sur le dépistage de l'anévrisme de l'aorte abdominale**

| Organisation                                                                                   | Recommandations                                                                                                                                                                                                                                                                                                                                                                                                                                                                                                                                                                                                                                                                                                                                                                                                                                                                                                                     |
|------------------------------------------------------------------------------------------------|-------------------------------------------------------------------------------------------------------------------------------------------------------------------------------------------------------------------------------------------------------------------------------------------------------------------------------------------------------------------------------------------------------------------------------------------------------------------------------------------------------------------------------------------------------------------------------------------------------------------------------------------------------------------------------------------------------------------------------------------------------------------------------------------------------------------------------------------------------------------------------------------------------------------------------------|
| Groupe d'étude canadien sur les soins de santé préventifs (lignes directrices actuelles, 2017) | Le Groupe d'étude fait 3 recommandations sur le dépistage de l'AAA: <ul style="list-style-type: none"> <li>• Nous recommandons un dépistage ponctuel de l'anévrisme de l'aorte par échographie abdominale chez les hommes âgés de 65 à 80 ans. (<i>Recommandation faible; données probantes de qualité moyenne</i>)</li> <li>• Nous recommandons de ne pas dépister les hommes âgés de plus de 80 ans pour l'AAA. (<i>Recommandation faible, données probantes de faible qualité</i>)</li> <li>• Nous recommandons de ne pas dépister les femmes pour l'AAA. (<i>Recommandation forte, données probantes de très faible qualité</i>)</li> </ul>                                                                                                                                                                                                                                                                                     |
| Groupe d'étude canadien sur les soins de santé préventifs (1991) <sup>14</sup>                 | En 1991, le Groupe d'étude a conclu que les données probantes sur le dépistage de l'AAA étant insuffisantes, il ne pouvait pas recommander de faire ou de ne pas faire de dépistage.                                                                                                                                                                                                                                                                                                                                                                                                                                                                                                                                                                                                                                                                                                                                                |
| Société canadienne de chirurgie vasculaire (2008) <sup>58</sup>                                | La Société canadienne de chirurgie vasculaire recommande aux ministères national et provinciaux de la Santé de mettre sur pied un program populationnel complet de dépistage par échographie incluant la prise en charge des personnes dépistées. Cette recommandation n'est pas cotée. Elle propose aussi le dépistage de l'AAA par échographie chez tous les hommes de 65 à 75 ans, ainsi qu'un dépistage sélectif chez les patients à risque élevé d'AAA, y compris les femmes de plus de 65 ans qui présentent un risque élevé en raison du tabagisme, d'une maladie cardiovasculaire ou d'antécédents familiaux, et les hommes de moins de 65 ans ayant des antécédents familiaux d'AAA. Cette recommandation n'est pas cotée.                                                                                                                                                                                                 |
| US Prevention Services Task Force (2014) <sup>57</sup>                                         | Le US Preventive Services Task Force recommande le dépistage ponctuel de l'AAA par échographie chez les hommes de 65 à 75 ans qui ont déjà fumé. C'est une recommandation de grade B fondée sur le risque. Il recommande aussi le dépistage sélectif de l'AAA chez les hommes de ce groupe d'âge qui n'ont jamais fumé. C'est une recommandation de grade C fondée sur le risque. Il conclut que les données probantes actuelles étant insuffisantes, il ne peut pas évaluer le rapport entre les bienfaits et les préjudices du dépistage de l'AAA chez les femmes de 65 à 75 ans qui ont déjà fumé. C'est une recommandation de grade I, c'est-à-dire qu'aucune recommandation n'est faite. Enfin, il ne recommande pas le dépistage de l'AAA chez les femmes qui n'ont jamais fumé. C'est une recommandation de grade D, car les préjudices du dépistage de l'AAA chez ces femmes pourraient surpasser les bienfaits potentiels. |
| American College of Preventive Medicine (2011) <sup>59</sup>                                   | L'American College of Preventive Medicine recommande le dépistage de l'AAA chez les hommes de 65 à 75 ans qui ont déjà fumé, mais il ne recommande pas le dépistage systématique chez les femmes. Cette recommandation fondée sur le risque n'est pas cotée.                                                                                                                                                                                                                                                                                                                                                                                                                                                                                                                                                                                                                                                                        |
| American College of Cardiology et American Heart Association (2006) <sup>60</sup>              | L'American College of Cardiology et l'American Heart Association recommandent le dépistage ponctuel de l'AAA chez les hommes de 65 à 75 ans qui ont déjà fumé (Catégorie I) et les hommes de 60 ans ou plus qui ont des antécédents familiaux d'AAA (Catégorie IIa). C'est une recommandation de grade B fondée sur le risque.                                                                                                                                                                                                                                                                                                                                                                                                                                                                                                                                                                                                      |
| European Society for Vascular Surgery (2011) <sup>61</sup>                                     | L'European Society for Vascular Surgery recommande le dépistage de l'AAA chez les hommes à l'âge de 65 ans. C'est une recommandation de grade A (niveau 1a). Le dépistage doit être envisagé plus tôt chez les hommes à risque plus élevé — par exemple, ceux qui fument, présentent d'autres maladies cardiovasculaires ou ont des antécédents familiaux d'AAA. C'est une recommandation de grade C (niveau 4) fondée sur le risque.                                                                                                                                                                                                                                                                                                                                                                                                                                                                                               |

Note: AAA = anévrisme de l'aorte abdominale.

65 à 80 ans avec qui les fournisseurs de soins primaires discutent du dépistage de l'AAA, le nombre de patients soumis au dépistage et les résultats du dépistage.

## Autres lignes directrices

Le US Preventive Services Task Force recommande le dépistage de l'AAA par échographie chez les hommes de 65 à 75 ans qui ont déjà fumé<sup>57</sup>. Les lignes directrices de la Société canadienne de chirurgie vasculaire recommandent le dépistage chez les hommes de 65 à 75 ans.<sup>58</sup> Le tableau 3 indique les recommandations d'autres lignes directrices.

## Lacunes dans l'état des connaissances

Des études plus poussées s'imposent pour déterminer si le dépistage a un impact différent sur l'état de santé de sous-groupes de patients, y compris ceux qui ont déjà fumé et les adultes ayant des antécédents familiaux d'AAA, et s'il est préférable de soumettre de façon répétée au dépistage l'ensemble des patients ou seulement des groupes particuliers de patients, par exemple en fonction de la race ou de l'origine ethnique. Des études plus poussées doivent aussi viser la surveillance épidémiologique de l'AAA, car le dépistage en fonction de l'âge pourrait entraîner moins de bienfaits si la prévalence d'AAA continue de décliner dans la population générale. Finalement, une démarche plus ciblée en matière de dépistage peut être nécessaire.

## Conclusion

À la lumière de l'examen systématique des données probantes, le Groupe d'étude a révisé ses recommandations de 1991 quant au dépistage de l'AAA. Selon les résultats groupés de 4 études populationnelles contrôlées et randomisées, le dépistage chez les hommes de 65 à 80 ans entraîne suffisamment de bienfaits (réduction de la mortalité, des ruptures de l'AAA et des interventions d'urgence) pour surpasser le risque de découvrir et d'offrir une intervention élective inutile pour un AAA qui n'aurait pu jamais se rompre, mais mène à une intervention élective inutile.

## Références

- Forbes T. Anévrismes de l'aorte abdominale (AAA). Ottawa: Société canadienne de chirurgie vasculaire (SCCV). Disponible : <https://vascular.ca/Anevrismes-de-laorte-abdominal/~french> (consulté le 16 janvier 2017).
- Morrison A. Traitement endovasculaire de l'anévrisme de l'aorte abdominale. Analyse prospective No 9. Ottawa: Agence canadienne des médicaments et des technologies de la santé (ACMTS); 2010. Disponible : [https://www.cadth.ca/sites/default/files/pdf/ES9\\_Abdominal\\_Aortic\\_Aneurysm\\_f.pdf](https://www.cadth.ca/sites/default/files/pdf/ES9_Abdominal_Aortic_Aneurysm_f.pdf) (consulté le 16 janvier 2017).
- Tableau 102-0529: Décès, selon la cause, Chapitre IX: Maladies de l'appareil circulatoire (I00 à I99), le groupe d'âge et le sexe, Canada. Ottawa: Statistique Canada; 2015. Disponible : <http://www5.statcan.gc.ca/cansim/a05?id=1020529&lang=fr> (consulté le 16 janvier 2017).
- Paravastu SCV, Jayarajasingam R, Cottam R, et al. Endovascular repair of abdominal aortic aneurysm. *Cochrane Database Syst Rev* 2014;(1):CD004178.
- Lederle FA, Johnson GR, Wilson SE, et al. The aneurysm detection and management study screening program: validation cohort and final results. *Aneurysm Detection and Management Veterans Affairs Cooperative Study Investigators. Arch Intern Med* 2000;160:1425-30.
- Scott RA, Bridgewater SG, Ashton HA. Randomized clinical trial of screening for abdominal aortic aneurysm in women. *Br J Surg* 2002;89:283-5.
- Thompson SG, Brown LC, Sweeting MJ, et al.; RESCAN collaborators. Systematic review and meta-analysis of the growth and rupture rates of small abdominal aortic aneurysms: implications for surveillance intervals and their cost-effectiveness. *Health Technol Assess* 2013;17:1-118.
- Lederle FA, Johnson GR, Wilson SE, et al. Prevalence and associations of abdominal aortic aneurysm detected through screening. *Aneurysm Detection and Management (ADAM) Veterans Affairs Cooperative Study Group. Ann Intern Med* 1997;126:441-9.
- Wilmink AB, Hubbard CS, Day NE, et al. The incidence of small abdominal aortic aneurysms and the change in normal infrarenal aortic diameter: implications for screening. *Eur J Vasc Endovasc Surg* 2001;21:165-70.
- van Vlijmen-van Keulen CJ, Pals G, Rauwerda JA. Familial abdominal aortic aneurysm: a systematic review of a genetic background. *Eur J Vasc Endovasc Surg* 2002;24:105-16.
- Larsson E, Granath F, Swedenborg J, et al. A population-based case-control study of the familial risk of abdominal aortic aneurysm. *J Vasc Surg* 2009;49:47-50, discussion 51.
- Hernesniemi JA, Vänni V, Hakala T. The prevalence of abdominal aortic aneurysm is consistently high among patients with coronary artery disease. *J Vasc Surg* 2015;62:232-40.e3.
- De Rango P, Farchioni L, Fiorucci B, et al. Diabetes and abdominal aortic aneurysms. *Eur J Vasc Endovasc Surg* 2014;47:243-61.
- Periodic health examination, 1991 update: 5. Screening for abdominal aortic aneurysm. Canadian Task Force on the Periodic Health Examination. *CMAJ* 1991;145:783-9.
- Norman PE, Jamrozik K, Lawrence-Brown MM, et al. Population based randomised controlled trial on impact of screening on mortality from abdominal aortic aneurysm. *BMJ* 2004;329:1259.
- Lindholt JS, Juul S, Fasting H, et al. Screening for abdominal aortic aneurysms: single centre randomised controlled trial. *BMJ* 2005;330:750.
- Ashton HA, Buxton MJ, Day NE, et al.; Multicentre Aneurysm Screening Study Group. The Multicentre Aneurysm Screening Study (MASS) into the effect of abdominal aortic aneurysm screening on mortality in men: a randomised controlled trial. *Lancet* 2002;360:1531-9.
- Scott RAP, Wilson NM, Ashton HA, et al. Influence of screening on the incidence of ruptured abdominal aortic aneurysm: 5-year results of a randomized controlled study. *Br J Surg* 1995;82:1066-70.
- Canadian Task Force on Preventive Health Care procedure manual. Calgary: Canadian Task Force on Preventive Health Care; 2014. Disponible : <https://canadiantaskforce.ca/methodologie/?lang=fr> (consulté le 12 mars 2017).
- Guirguis-Blake JM, Beil TL, Sun X, et al. *Primary care screening for abdominal aortic aneurysm: a systematic evidence review for the U.S. Preventive Services Task Force*. Evidence Syntheses No. 109. Report No. 14-05202-EF-1. Rockville (MD): Agency for Healthcare Research and Quality; 2014.
- Ali MU, Fitzpatrick-Lewis D, Miller J, et al. Screening for abdominal aortic aneurysm in asymptomatic adults. *J Vasc Surg* 2016;64:1855-68.
- Fitzpatrick-Lewis D, Warren R, Ali MU, et al. Screening for abdominal aortic aneurysm: systematic review and meta-analysis. Hamilton (ON): Evidence Review and Synthesis Centre, McMaster University; 2015. Disponible : <https://canadiantaskforce.ca/lignesdirectrices/lignes-directrices-publiees/anevrisme-aortique-abdominal-2/?lang=fr> (consulté le 4 mai 2016).
- Fitzpatrick-Lewis D, Warren R, Ali MU, et al. Screening for abdominal aortic aneurysms: protocol. Hamilton (ON): Evidence Review and Synthesis Centre, McMaster University; 2015. Disponible : <http://canadiantaskforce.ca/ctfphc-guidelines/2015-abdominal-aortic-aneurism/protocol/> (consulté le 16 janvier 2017).



24. Ali MU, Fitzpatrick-Lewis D, Raina P, et al. Screening for abdominal aortic aneurysm: updated GRADE tables. Hamilton (ON): Evidence Review and Synthesis Centre, McMaster University; 2017. Disponible : <https://canadiantaskforce.ca/lignes-directrices/lignes-directrices-publiees/anevrisme-aortique-abdominal-2/?lang=fr> (consulté le 14 mai 2017).
25. Ali MU, Fitzpatrick-Lewis D, Raina P, et al. Absolute effects for harms outcomes; one-time AAA screening in men with ultrasound [updated July 2017]. Hamilton (ON): Evidence Review and Synthesis Centre, McMaster University; 2017. Disponible : <https://canadiantaskforce.ca/lignes-directrices/lignes-directrices-publiees/anevrisme-aortique-abdominal-2/?lang=fr> (consulté le 7 juillet 2017).
26. Buckland D, Sayal R, Bashir N, et al.; Canadian Task Force on Preventive Health Care. Patient preferences for abdominal aortic aneurysm screening: final report. Toronto : Knowledge Translation Program, Li Ka Shing Knowledge Institute, St Michael's Hospital; 2016. Disponible : <https://canadiantaskforce.ca/lignes-directrices/lignes-directrices-publiees/anevrisme-aortique-abdominal-2/?lang=fr> (consulté le 16 janvier 2017).
27. Pottie K. *GRADE Working Group Meeting*. Equity update. Cochrane Methods Equity; 2017. Disponible : <http://mailchi.mp/4a2869da74f1/campbell-and-cochrane-equity-methods-group-may-2017-newsletter?e=1b3efde715> (consulté le 14 mai 2017).
28. Schünemann H, Brozek J, Guyatt G, et al., editors. *GRADE handbook*. The GRADE Working Group; 2013. Disponible : <http://gdt.guidelinedevelopment.org/app/handbook/handbook.html> (consulté le 16 janvier 2017).
29. Kim LG, Scott RAP, Ashton HA, et al.; Multicentre Aneurysm Screening Study Group. A sustained mortality benefit from screening for abdominal aortic aneurysm. *Ann Intern Med* 2007;146:699-706.
30. Thompson SG, Ashton HA, Gao L, et al.; Multicentre Aneurysm Screening Study (MASS) Group. Final follow-up of the Multicentre Aneurysm Screening Study (MASS) randomized trial of abdominal aortic aneurysm screening. *Br J Surg* 2012;99:1649-56.
31. Thompson SG, Ashton HA, Gao L, et al.; Multicentre Aneurysm Screening Study (MASS) Group. Screening men for abdominal aortic aneurysm: 10 year mortality and cost effectiveness results from the randomised Multicentre Aneurysm Screening Study. *BMJ* 2009;338:b2307.
32. Ashton HA, Gao L, Kim LG, et al. Fifteen-year follow-up of a randomized clinical trial of ultrasonographic screening for abdominal aortic aneurysms. *Br J Surg* 2007;94:696-701.
33. Vardulaki KA, Walker NM, Couto E, et al. Late results concerning feasibility and compliance from a randomized trial of ultrasonographic screening for abdominal aortic aneurysm. *Br J Surg* 2002;89:861-4.
34. McCaul KA, Lawrence-Brown M, Dickinson JA, et al. Long-term outcomes of the Western Australian trial of screening for abdominal aortic aneurysms: secondary analysis of a randomized clinical trial. *JAMA Intern Med* 2016;176:1761-7.
35. Lindholt JS, Juul S, Fasting H, et al. Hospital costs and benefits of screening for abdominal aortic aneurysms. Results from a randomised population screening trial. *Eur J Vasc Endovasc Surg* 2002;23:55-60.
36. Lindholt JS, Sørensen J, Søgaard R, et al. Long-term benefit and cost-effectiveness analysis of screening for abdominal aortic aneurysms from a randomized controlled trial. *Br J Surg* 2010;97:826-34.
37. Lindholt JS, Vammen S, Fasting H, et al. Psychological consequences of screening for abdominal aortic aneurysm and conservative treatment of small abdominal aortic aneurysms. *Eur J Vasc Endovasc Surg* 2000;20:79-83.
38. Spencer CA, Norman PE, Jamrozik K, et al. Is screening for abdominal aortic aneurysm bad for your health and well-being? *ANZ J Surg* 2004;74:1069-75.
39. Johansson M, Hansson A, Brodersen J. Estimating overdiagnosis in screening for abdominal aortic aneurysm: could a change in smoking habits and lowered aortic diameter tip the balance of screening towards harm? *BMJ* 2015;350:h825.
40. Darwood R, Earnshaw JJ, Turton G, et al. Twenty-year review of abdominal aortic aneurysm screening in men in the county of Gloucestershire, United Kingdom. *J Vasc Surg* 2012;56:8-13.
41. Svensjö S, Björck M, Gürtelschmid M, et al. Low prevalence of abdominal aortic aneurysm among 65-year-old Swedish men indicates a change in the epidemiology of the disease. *Circulation* 2011;124:1118-23.
42. Rahman P, Jaramillo Garcia A. Screening for abdominal aortic aneurysm: GRADE tables for subgroup populations. Ottawa: Public Health Agency of Canada; 2017. Disponible : <https://canadiantaskforce.ca/lignes-directrices/lignes-directrices-publiees/anevrisme-aortique-abdominal-2/?lang=fr> (consulté le 15 mai 2017).
43. Ulug P, Sweeting MJ, von Allmen RS, et al.; SWAN collaborators. Morphological suitability for endovascular repair, non-intervention rates, and operative mortality in women and men assessed for intact abdominal aortic aneurysm repair: systematic reviews with meta-analysis. *Lancet* 2017;389:2482-91.
44. Schmidt T, Mühlberger N, Chemelli-Steingruber IE, et al. Benefit, risks and cost-effectiveness of screening for abdominal aortic aneurysm. *RoFo Fortschr Geb Rontgenstr Nuklearmed* 2010;182:573-80.
45. Ehlers L, Sørensen J, Jensen LG, et al. Is population screening for abdominal aortic aneurysm cost-effective? *BMC Cardiovasc Disord* 2008;8:32.
46. Svensjö S, Mani K, Björck M, et al. Screening for abdominal aortic aneurysm in 65-year-old men remains cost-effective with contemporary epidemiology and management. *Eur J Vasc Endovasc Surg* 2014;47:357-65.
47. Spronk S, van Kempen BJH, Boll APM, et al. Cost-effectiveness of screening for abdominal aortic aneurysm in the Netherlands and Norway. *Br J Surg* 2011;98:1546-55.
48. Glover MJ, Kim LG, Sweeting MJ, et al. Cost-effectiveness of the National Health Service abdominal aortic aneurysm screening programme in England. *Br J Surg* 2014;101:976-82.
49. Wanhainen A, Hultgren R, Linné A, et al.; Swedish Aneurysm Screening Study Group (SASS). Outcome of the Swedish Nationwide Abdominal Aortic Aneurysm Screening Program. *Circulation* 2016;134:1141-8.
50. Barry MJ, Edgman-Levitan S. Shared decision making — the pinnacle of patient-centered care. *N Engl J Med* 2012;366:780-1.
51. Elwyn G, Frosch D, Thomson R, et al. Shared decision making: a model for clinical practice. *J Gen Intern Med* 2012;27:1361-7.
52. Kent KC, Zwolak RM, Egorova NN, et al. Analysis of risk factors for abdominal aortic aneurysm in a cohort of more than 3 million individuals. *J Vasc Surg* 2010;52:539-48.
53. Lederle FA, Nelson DB, Joseph AM. Smokers' relative risk for aortic aneurysm compared with other smoking-related diseases: a systematic review. *J Vasc Surg* 2003;38:329-34.
54. Sweeting MJ, Thompson SG, Brown LC; RESCAN collaborators. Meta-analysis of individual patient data to examine factors affecting growth and rupture of small abdominal aortic aneurysms. *Br J Surg* 2012;99:655-65.
55. Khashram M, Williman JA, Hider PN, et al. Systematic review and meta-analysis of factors influencing survival following abdominal aortic aneurysm repair. *Eur J Vasc Endovasc Surg* 2016;51:203-15.
56. Blois B. Office-based ultrasound screening for abdominal aortic aneurysm. *Can Fam Physician* 2012;58:e172-8.
57. LeFevre ML; U.S. Preventive Services Task Force. Screening for abdominal aortic aneurysm: U.S. Preventive Services Task Force recommendation statement. *Ann Intern Med* 2014;161:281-90.
58. *Société canadienne de chirurgie vasculaire: prise de position sur le dépistage de l'anévrisme de l'aorte abdominale*. Ottawa : Société canadienne de chirurgie vasculaire; 2008. Disponible : [https://canadianvascular.ca/Resources/Documents/AAA\\_prise\\_position08.pdf](https://canadianvascular.ca/Resources/Documents/AAA_prise_position08.pdf) (consulté le 15 octobre 2016).
59. Lim LS, Haq N, Mahmood S, et al.; ACPM Prevention Practice Committee. American College of Preventive Medicine. Atherosclerotic cardiovascular disease screening in adults: American College of Preventive Medicine position statement on preventive practice. *Am J Prev Med* 2011;40:381.e1-10.
60. Hirsch AT, Haskal ZJ, Hertzler NR, et al.; American Association for Vascular Surgery; Society for Vascular Surgery; Society for Cardiovascular Angiography and Interventions; Society for Vascular Medicine and Biology; Society of Interventional

Radiology; ACC/AHA Task Force on Practice Guidelines Writing Committee to Develop Guidelines for the Management of Patients With Peripheral Arterial Disease; American Association of Cardiovascular and Pulmonary Rehabilitation; National Heart, Lung, and Blood Institute; Society for Vascular Nursing; TransAtlantic Inter-Society Consensus; Vascular Disease Foundation. ACC/AHA 2005 Practice Guidelines for the management of patients with peripheral arterial disease (lower extremity, renal, mesenteric, and abdominal aortic): a collaborative report from the American Association for Vascular Surgery/Society for Vascular Surgery, Society for Cardiovascular Angiography and Interventions, Society for Vascular Medicine and Biology, Society of Interventional Radiology, and the ACC/AHA Task

Force on Practice Guidelines (Writing Committee to Develop Guidelines for the Management of Patients With Peripheral Arterial Disease): endorsed by the American Association of Cardiovascular and Pulmonary Rehabilitation; National Heart, Lung, and Blood Institute; Society for Vascular Nursing; TransAtlantic Inter-Society Consensus; and Vascular Disease Foundation. *Circulation* 2006;113:e463-654.

61. Moll FL, Powell JT, Fraedrich G, et al.; European Society for Vascular Surgery. Management of abdominal aortic aneurysms clinical practice guidelines of the European society for vascular surgery. *Eur J Vasc Endovasc Surg* 2011;41(Suppl 1): S1-58.

Cet article a été révisé par des pairs.

**Auteurs :** Harminder Singh MD MPH, Neil Bell MD, James A. Dickinson MBBS PhD, Gabriela Lewin MD, Marcello Tonelli MD SM, Brett Thombs PhD, Nathalie M. Holmes BA, Alejandra Jaramillo Garcia MSc, Prinon Rahman MSc, Nicki Sims-Jones RN MScN

**Intérêts concurrents :** James Dickinson déclare avoir reçu des subventions de l'Agence de la santé publique du Canada au cours de l'étude et avoir récemment écrit un article sur l'étude menée en Australie-Occidentale sur le dépistage de l'anévrisme de l'aorte abdominale. Aucun autre intérêt concurrent n'a été signalé.

**Affiliations :** Départements de médecine interne et des sciences de la santé communautaire (Singh), Université du Manitoba, Winnipeg, Man.; département de médecine familiale (Bell), Université de l'Alberta, Edmonton, Alta.; départements de médecine familiale et des sciences de la santé communautaire (Dickinson), Université de Calgary, Calgary, Alta.; département de médecine familiale (Lewin), Université d'Ottawa, Ottawa, Ont.; département de médecine (Tonelli), Université de Calgary, Calgary, Alta.; département de psychiatrie (Thombs), Université McGill, Montréal, Que.; Agence de la santé publique du Canada (Holmes, Jaramillo Garcia, Rahman), Ottawa, Ont.; Agence de la santé publique du Canada (Sims-Jones), Vancouver, BC

**Équipe de rédaction des lignes directrices :**

Harminder Singh, Nathalie Holmes (membre sans droit de vote), Alejandra Jaramillo Garcia (membre sans droit de vote), Neil Bell, James Dickinson (membre sans droit de vote), Gabriela Lewin, Marcello Tonelli, Nicki Sims-Jones (membre sans droit de vote), Prinon Rahman (membre sans droit de vote).

**Collaborateurs :** Harminder Singh, Neil Bell, James Dickinson, Gabriela Lewin, Marcello Tonelli, Brett Thombs, Nathalie Holmes, Alejandra Jaramillo Garcia, Prinon Rahman, Nicki Sims-Jones et des membres du Groupe d'étude ne faisant pas partie du groupe de travail sur les lignes directrices ont contribué substantiellement à la conception et à la structure de l'article ainsi qu'à l'interprétation des données probantes, et ont révisé la version préliminaire du document. Harminder Singh, Nathalie Holmes, Alejandra Jaramillo Garcia, Prinon Rahman et Nicki Sims-Jones ont dirigé l'analyse et rédigé la version préliminaire du document. Tous les auteurs ont approuvé la version finale soumise pour publication et se portent garants de tous les aspects du travail.

**Financement :** Le financement du Groupe d'étude canadien sur les soins de santé préventifs est assuré par l'Agence de la santé publique du Canada. Les points de vue de l'organisme de financement n'ont pas eu d'influence sur le contenu des lignes directrices; les intérêts concurrents ont été relevés et pris en compte.

Les opinions exprimées dans cet article sont celles du Groupe d'étude et ne représentent pas celles de l'Agence de santé publique du Canada.

**Remerciements :** Les auteurs tiennent à remercier les auteurs de l'analyse des données probantes qui a servi de fondement aux lignes directrices (Université McMaster): Donna Fitzpatrick-Lewis, Rachel Warren, Muhammad Usman Ali, Meghan Kenny, Maureen Rice, Sharon Peck-Reid, Diana Sheri-Fali et Parminder Raina. Ils remercient aussi les spécialistes en contenu de leurs judicieux conseils: Prasad Jetty, Hôpital d'Ottawa et Université d'Ottawa; Bart Ferket, Icahn School of Medicine at Mount Sinai; et Paul Norman, Université de l'Australie-Occidentale. Les auteurs tiennent aussi à remercier le programme de transfert des connaissances de l'Hôpital St. Michael, qui a conçu les outils de transfert des connaissances destinés aux patients et aux cliniciens, et les parties prenantes qui ont revu les lignes directrices à l'aide de l'outil FACE et accepté d'être mentionnées: Joni Boyd, Association canadienne des écoles de sciences infirmières; Amanda Amero-Hubbard, Hôpital de Yarmouth; et Gilles Plourde, Santé Canada. Nous remercions aussi tous ceux qui ont fait des commentaires, mais qui ne voulaient pas que leur nom soit mentionné.

**Correspondance :** Groupe d'étude canadien sur les soins de santé préventifs, info@canadiantaskforce.ca
